# Supplementary material for: A rationally designed dual role anode material for lithium-ion and sodium-ion batteries: case study of eco-friendly Fe3O4
Source: Royal Society of Chemistry journal article supplement (doi:10.1039/c2cp44572g), 2013-01-01
Supplement: c2cp44572g.pdf [file c2cp44572g.pdf]

## A Rationally Designed Dual Role Anode Material for Lithium-ion and Sodium-ion Batteries: Case Study of Eco-Friendly $\text{Fe}_3\text{O}_4$

Srirama Hariharan, Kuppan Saravanan, Vishwanathan Ramar and Palani Balaya\*

*Department of Mechanical Engineering, National University of Singapore,*

*Singapore-117576. E-mail: mpepb@nus.edu.sg*

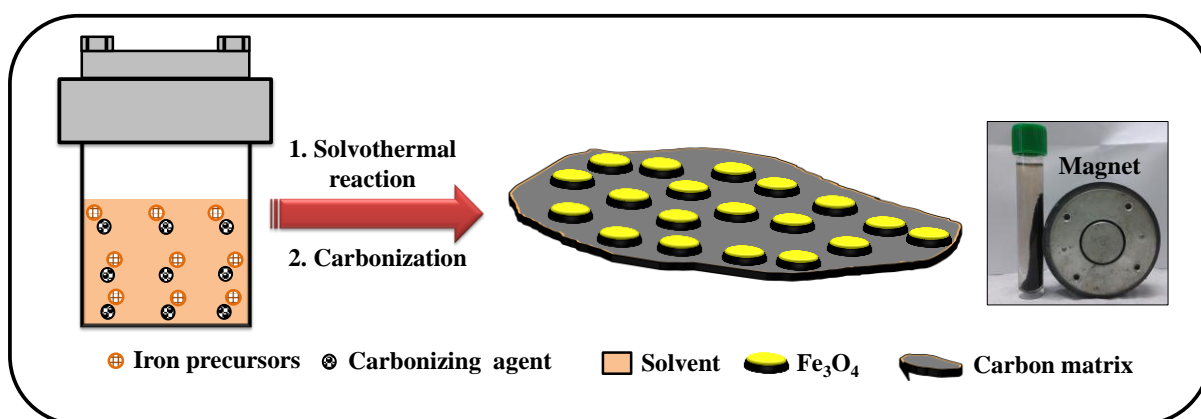

**Fig. S1.** Schematic depiction of the active material preparation process.

The solvothermal reaction was carried out at 200 °C for 16 h. The carbonization was performed at 450 °C for 4 h in an inert atmosphere of Argon. The optical photograph shows that the prepared material was magnetic (qualitative test only).

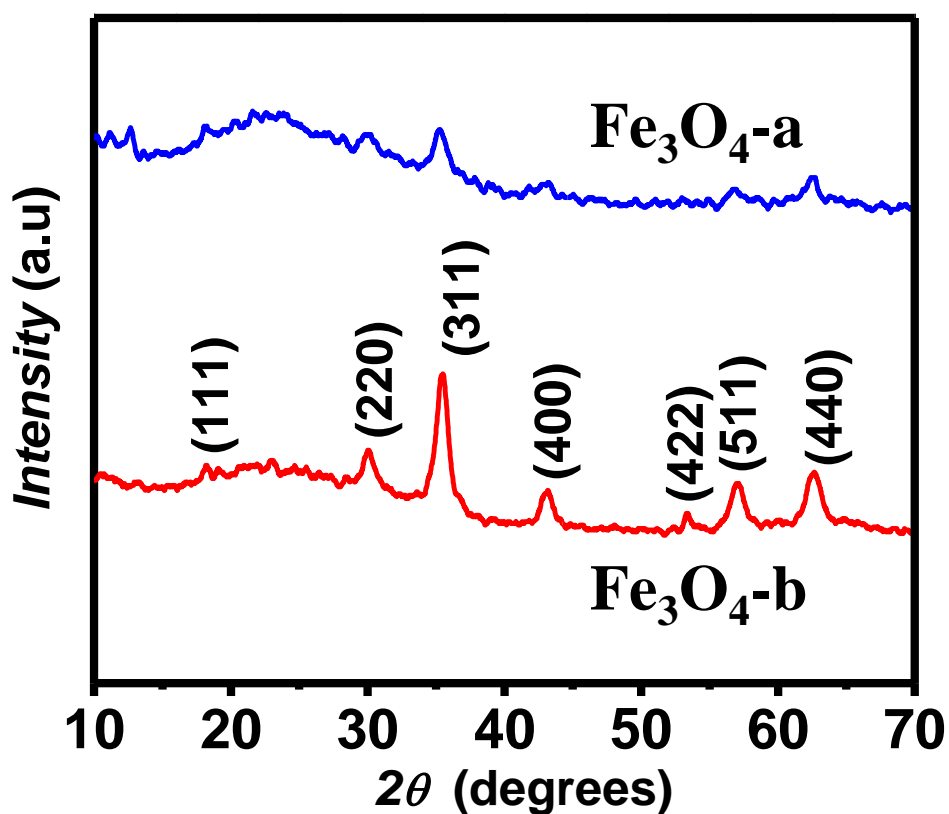

**Fig. S2** XRD patterns of the intermediate product obtained after solvothermal reaction at 200 °C, before carbonization.

Intermediate product of  $\text{Fe}_3\text{O}_4\text{-a}$  appears to be relatively amorphous compared to those of  $\text{Fe}_3\text{O}_4\text{-b}$ . The peaks of  $\text{Fe}_3\text{O}_4\text{-b}$  indexed here match with the standard pattern of  $\text{Fe}_3\text{O}_4$  (ICDD card No. 19-0629)

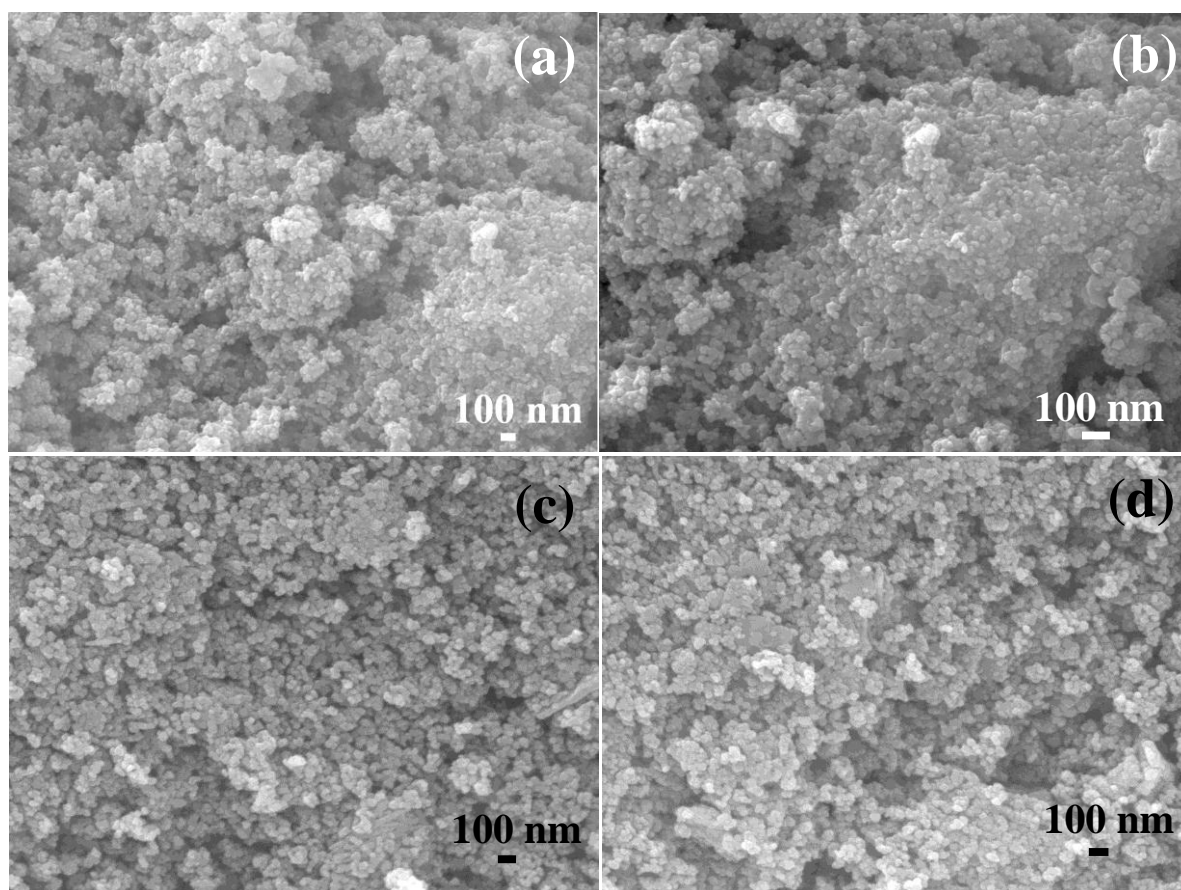

**Fig. S3** (a) & (b) FESEM images of the final product of  $\text{Fe}_3\text{O}_4\text{-a}$  recorded at different regions.  
(c) & (d) FESEM images of the final product of  $\text{Fe}_3\text{O}_4\text{-b}$  recorded at different regions.

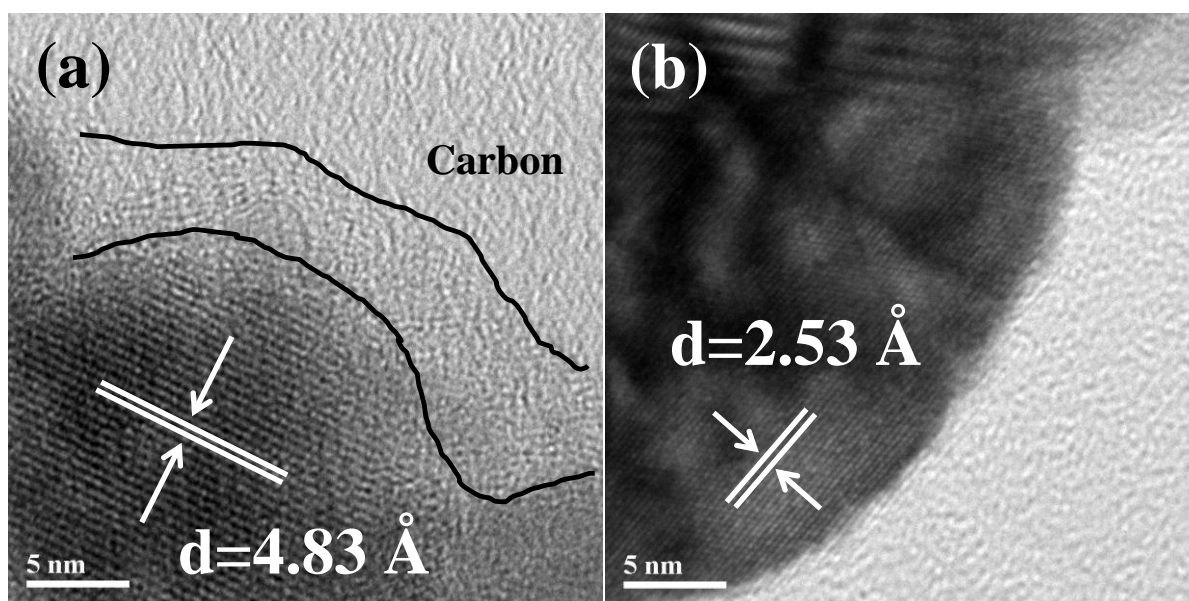

**Fig. S4** (a) & (b) HRTEM images of  $\text{Fe}_3\text{O}_4$ -a and  $\text{Fe}_3\text{O}_4$ -b samples.

The HRTEM images clearly reveal the presence of a thin carbon layer surrounding the  $\text{Fe}_3\text{O}_4$ -a particle. However, the same could not be observed in  $\text{Fe}_3\text{O}_4$ -b.

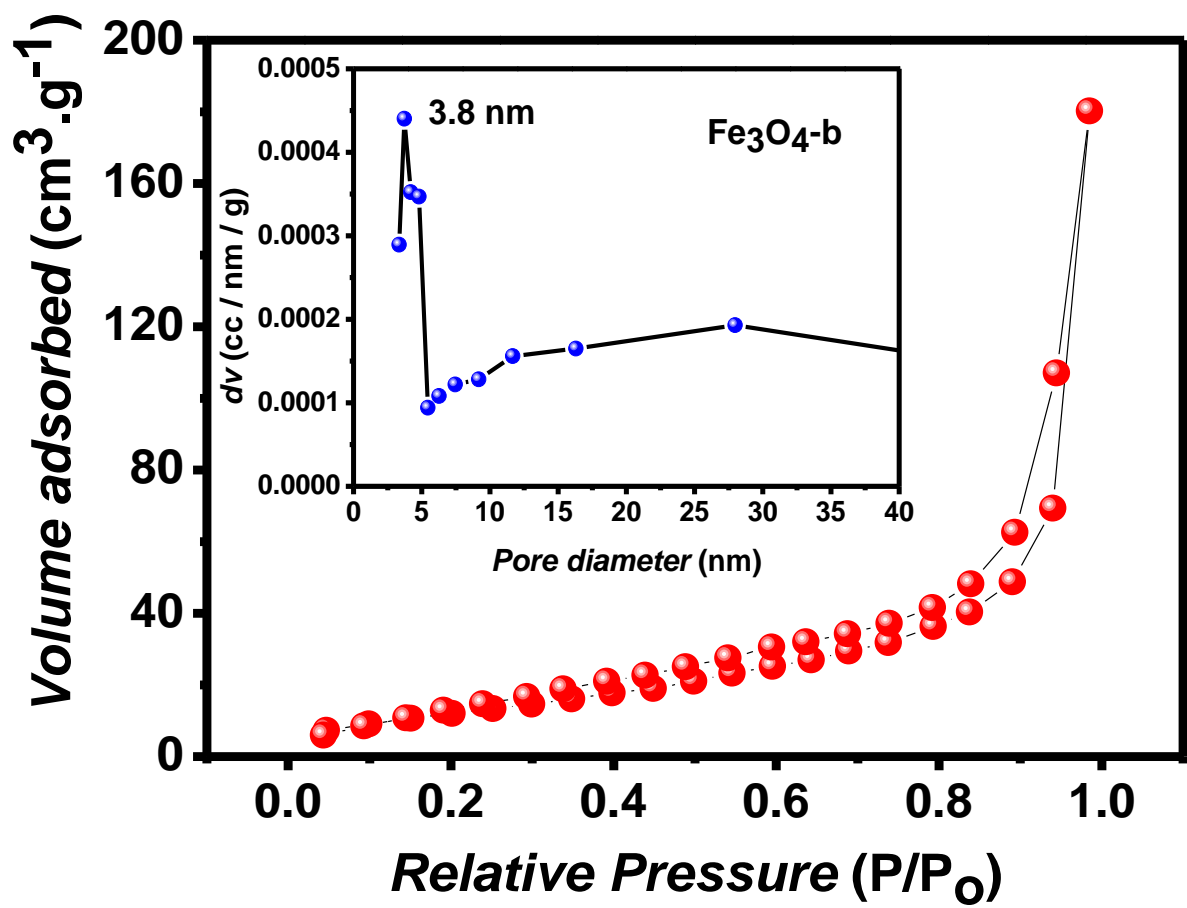

**Fig. S5** Nitrogen adsorption and desorption isotherm of Fe<sub>3</sub>O<sub>4</sub>-b. Inset shows the pore size distribution.

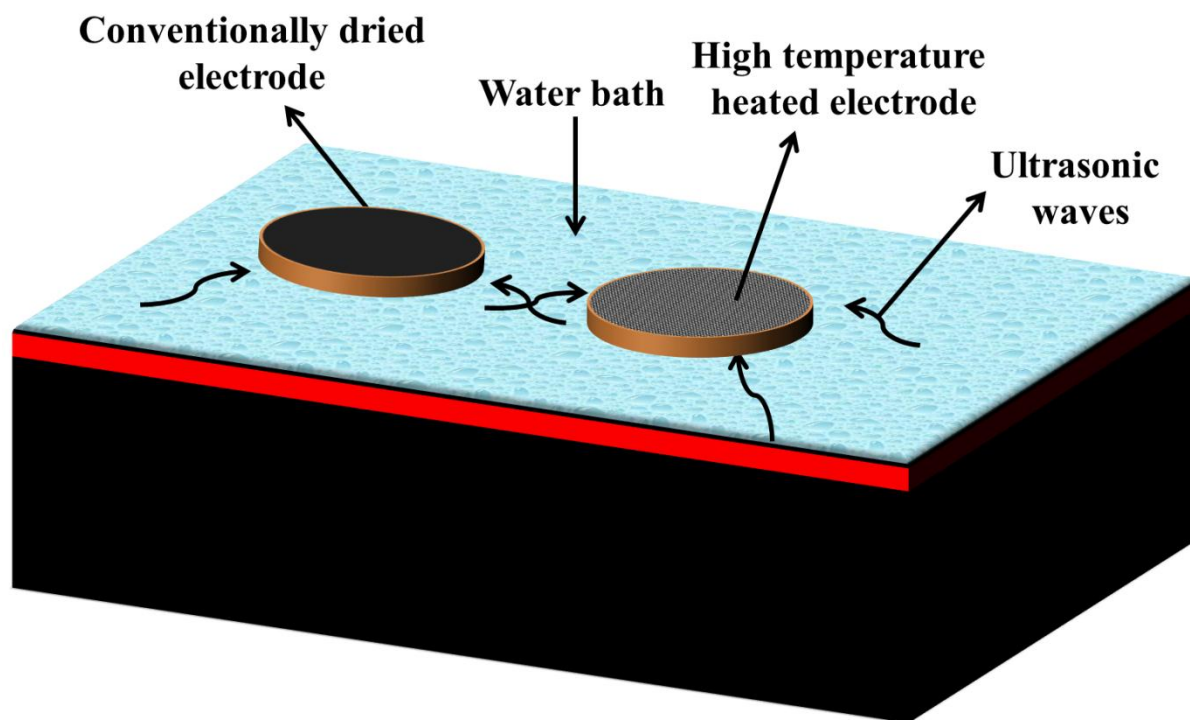

**Fig. S6** Schematic of the experimental set-up used for performing qualitative adhesion tests.

For the qualitative adhesion test, the electrodes were first soaked in 40 ml of water. The electrodes were then continuously irradiated with ultrasonic waves over duration of 3 min.

The video of this test can be viewed in <http://youtu.be/ZzIpQH-hep0>



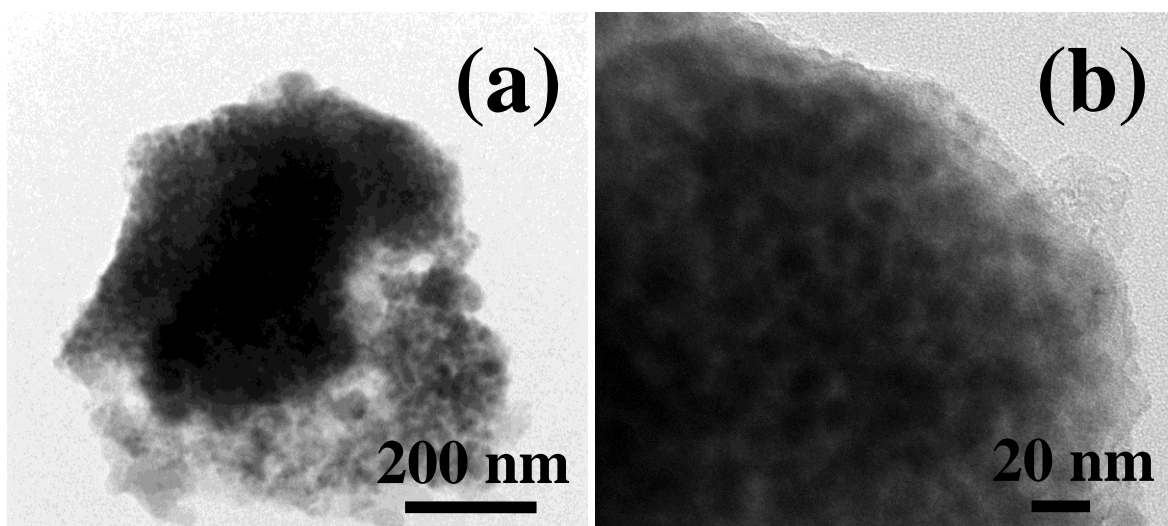

**Fig. S7** (a) & (b) TEM images recorded at different magnifications on  $\text{Fe}_3\text{O}_4\text{-a}$  after cycling at 12 C.

It could be seen that the carbon matrix firmly holds the active material particles keeping them connected with the main body of the electrode even after cycling at 12 C.

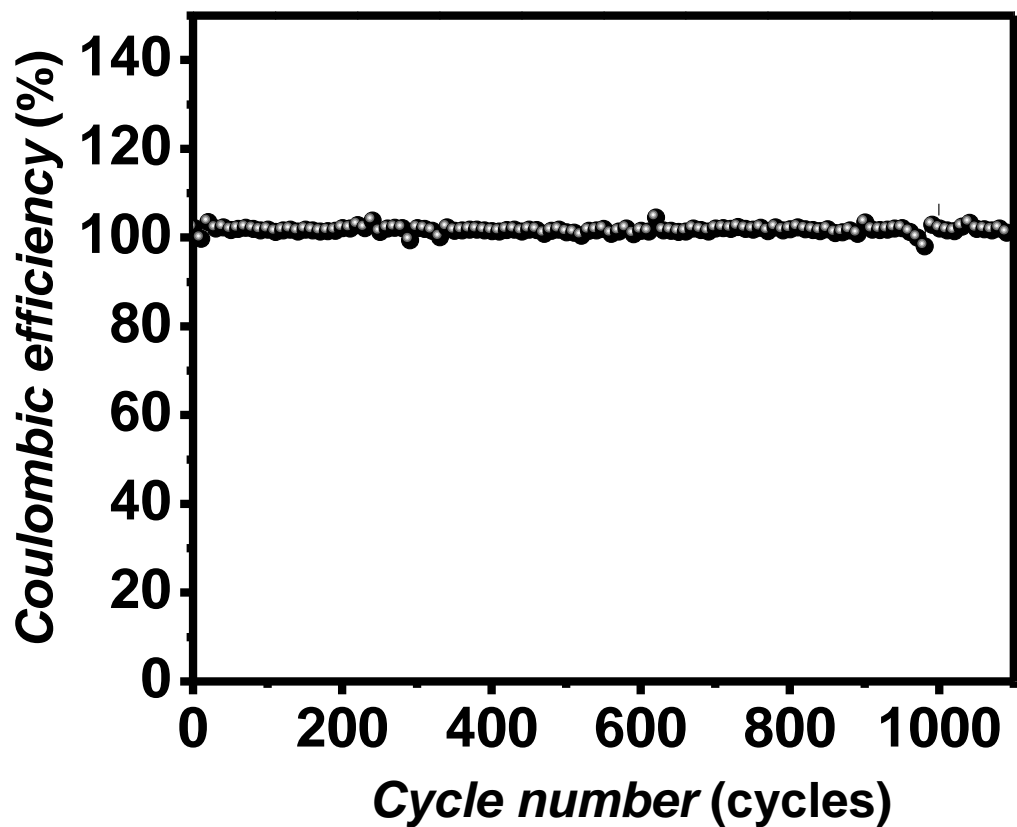

**Fig. S8.** Variation of coulombic efficiency as a function of cycle number of Fe<sub>3</sub>O<sub>4</sub>-a vs. Li/Li<sup>+</sup> with 13% external carbon additive cycled at 1.2 C rate in the voltage window 0.04-3.0 V.



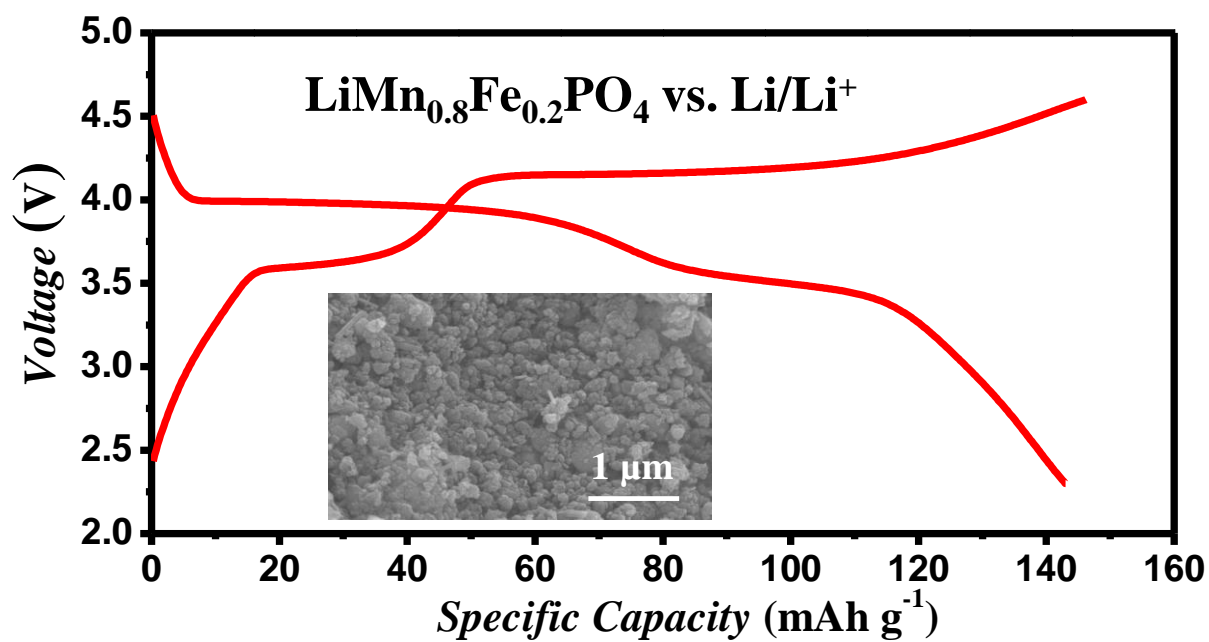

**Fig. S9.** Voltage profile of  $\text{LiMn}_{0.8}\text{Fe}_{0.2}\text{PO}_4$  vs.  $\text{Li/Li}^+$  at 0.1 C in the voltage window 2.3 - 4.6 V. More details of the cathode performance will be published elsewhere. <sup>1</sup>

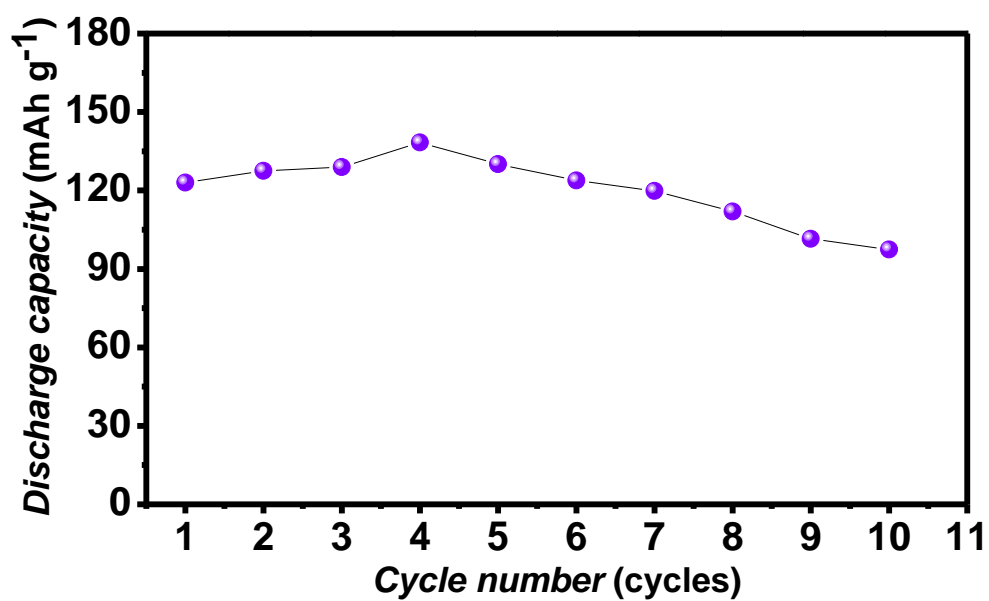

**Fig. S10.** Discharge capacity vs. cycle number of Fe<sub>3</sub>O<sub>4</sub>-a vs. LiMn<sub>0.8</sub>Fe<sub>0.2</sub>PO<sub>4</sub> at 0.12 C in the voltage window 0.5 - 3.75 V.

The capacity plotted here is shown based on the weight of the cathode. The first formation cycle is not shown here.

**Table S1:** Comparison of the electrochemical performance of Fe<sub>3</sub>O<sub>4</sub> obtained in this work with some of the compelling reports in literature.

| Nanocomposite                                                                       | Capacity retention after n <sup>th</sup> cycle with respect to first cycle at a specific current density (%) | Carbon content in the test electrodes (%)                              | Rate performance - Capacity delivered at current density (mAh g <sup>-1</sup> ) | Ref           |
|-------------------------------------------------------------------------------------|--------------------------------------------------------------------------------------------------------------|------------------------------------------------------------------------|---------------------------------------------------------------------------------|---------------|
| Fe <sub>3</sub> O <sub>4</sub> incorporating rational material and electrode design | No noticeable capacity fade upto 1100 cycles at 1.11 A g <sup>-1</sup>                                       | 28% carbon in the electrode (13% <i>ex-situ</i> + 15% <i>in-situ</i> ) | 610 mAh g <sup>-1</sup> at 11.11 A g <sup>-1</sup>                              | This work     |
| Carbon and Fe <sub>3</sub> O <sub>4</sub>                                           | No noticeable fade upto 100 cycles at 0.39 A g <sup>-1</sup>                                                 | 14% CNT                                                                | 482 mAh g <sup>-1</sup> at 6.25 A g <sup>-1</sup>                               | Ref 2<br>2012 |
| Carbon coated Fe <sub>3</sub> O <sub>4</sub>                                        | No noticeable fade upto 100 cycles at 0.1 A g <sup>-1</sup>                                                  | 27%<br>12% <i>in-situ</i> + 15% <i>ex-situ</i>                         | 418 mAh g <sup>-1</sup> at 2.5 A g <sup>-1</sup>                                | Ref 3<br>2012 |
| Fe <sub>3</sub> O <sub>4</sub> in carbon framework                                  | No noticeable fade upto 400 cycles at 1.848 A g <sup>-1</sup> (Total carbon in the electrode 30%)            | 30% carbon                                                             | 500 mAh g <sup>-1</sup> at 2.31 A g <sup>-1</sup>                               | Ref 4<br>2012 |
| Fe-Fe <sub>3</sub> O <sub>4</sub> composite                                         | -                                                                                                            | 10% pitch + 15% acetylene black                                        | 711 mAh g <sup>-1</sup> at 10 A g <sup>-1</sup>                                 | Ref 5<br>2012 |
| Nano architected Fe <sub>3</sub> O <sub>4</sub> array electrode                     | No noticeable fade after 220 cycles at a charge rate of 2.67 A g <sup>-1</sup>                               | -                                                                      | 231 mAh g <sup>-1</sup> at 8 A g <sup>-1</sup>                                  | Ref 6<br>2012 |
| Single walled carbon nanotube -Fe <sub>3</sub> O <sub>4</sub>                       | 92.94% after 60 cycles at 4.36 A g <sup>-1</sup>                                                             | 5% SWCNT                                                               | 550 mAh g <sup>-1</sup> at 8.72 A g <sup>-1</sup>                               | Ref 7<br>2011 |
| Fe <sub>3</sub> O <sub>4</sub> nanoparticle integrated graphene                     | 44% after 80 cycles at 1.85 A g <sup>-1</sup>                                                                | 5.5% <i>in-situ</i> 10% <i>ex-situ</i> 15.5%                           | 192 mAh g <sup>-1</sup> at 9.26 A g <sup>-1</sup>                               | Ref 8<br>2011 |
| Fe <sub>3</sub> O <sub>4</sub> -graphene nanocomposite                              | 800 cycles at different current densities.                                                                   | 20% graphene + 10% carbon                                              | 180 mAh g <sup>-1</sup> at 10 A g <sup>-1</sup>                                 | Ref 9<br>2011 |

|                                                           |                                                  |                                                              |                                                   |                |
|-----------------------------------------------------------|--------------------------------------------------|--------------------------------------------------------------|---------------------------------------------------|----------------|
| Graphene wrapped Fe <sub>3</sub> O <sub>4</sub>           | 91% after 100 cycles at 0.7 A g <sup>-1</sup>    | 13.3% graphene + 10% carbon                                  | 520 mAh g <sup>-1</sup> at 1.75 A g <sup>-1</sup> | Ref 10<br>2010 |
| Carbon coated Fe <sub>3</sub> O <sub>4</sub> nanowires    | No noticeable fade upto 50 cycles at 0.1C rate   | 25% carbon<br>(10% <i>in-situ</i> + 15% <i>ex-situ</i> )     | 600 mAh g <sup>-1</sup> at 5C                     | Ref 11<br>2009 |
| Carbon coated Fe <sub>3</sub> O <sub>4</sub> nanospindles | 88.3% after 80 cycles at 0.462 A g <sup>-1</sup> | 36.5% carbon<br>(21.5% <i>in situ</i> + 15% <i>ex-situ</i> ) | 190 mAh g <sup>-1</sup> at 4.62 A g <sup>-1</sup> | Ref 12<br>2008 |

## References

1. V. Ramar and P. Balaya, *Mansucrypt in preparation*, 2012.
2. X. Jia, Z. Chen, X. Cui, Y. Peng, X. Wang, G. Wang, F. Wei and Y. Lu, *Acs Nano*, 2012.
3. J. E. Lee, S.-H. Yu, D. J. Lee, D.-C. Lee, S. I. Han, Y.-E. Sung and T. Hyeon, *Energy & Environmental Science*, 2012, **5**, 9528-9533.
4. Y. Yu, Y. Zhu, H. Gong, Y. Ma, X. Zhang, N. Li and Y. Qian, *Electrochimica Acta*, 2012, **83**, 53-58.
5. H.-S. Kim, S. H. Baek, M.-W. Jang, Y.-K. Sun and C. S. Yoon, *Journal of the Electrochemical Society*, 2012, **159**, A325-A329.
6. F.-S. Ke, L. Huang, B. Zhang, G.-Z. Wei, L.-J. Xue, J.-T. Li and S.-G. Sun, *Electrochimica Acta*, 2012, **78**, 585-591.
7. C. Ban, Z. Wu, D. T. Gillaspie, L. Chen, Y. Yan, J. L. Blackburn and A. C. Dillon, *Advanced Materials*, 2010, **22**, E145-E149.
8. L. Ji, Z. Tan, T. R. Kuykendall, S. Aloni, S. Xun, E. Lin, V. Battaglia and Y. Zhang, *Physical chemistry chemical physics*, 2011, **13**, 7170-7177.
9. S. K. Behera, *Chemical Communications*, 2011, **47**, 10371-10373.
10. G. Zhou, D.-W. Wang, F. Li, L. Zhang, N. Li, Z.-S. Wu, L. Wen, G. Q. Lu and H.-M. Cheng, *Chemistry of Materials*, 2010, **22**, 5306-5313.
11. T. Muraliganth, A. Vadivel Murugan and A. Manthiram, *Chemical Communications*, 2009, 7360-7362.
12. W.-M. Zhang, X.-L. Wu, J.-S. Hu, Y.-G. Guo and L.-J. Wan, *Advanced Functional Materials*, 2008, **18**, 3941-3946.
